# Supplementary figures and images for: Retrograde fibroblast growth factor 22 (FGF22) signaling regulates insulin-like growth factor 2 (IGF2) expression for activity-dependent synapse stabilization in the mammalian brain
Source: eLife journal article supplement (doi:10.7554/elife.12151), 2016-04-15

Figure 8—figure supplement 1

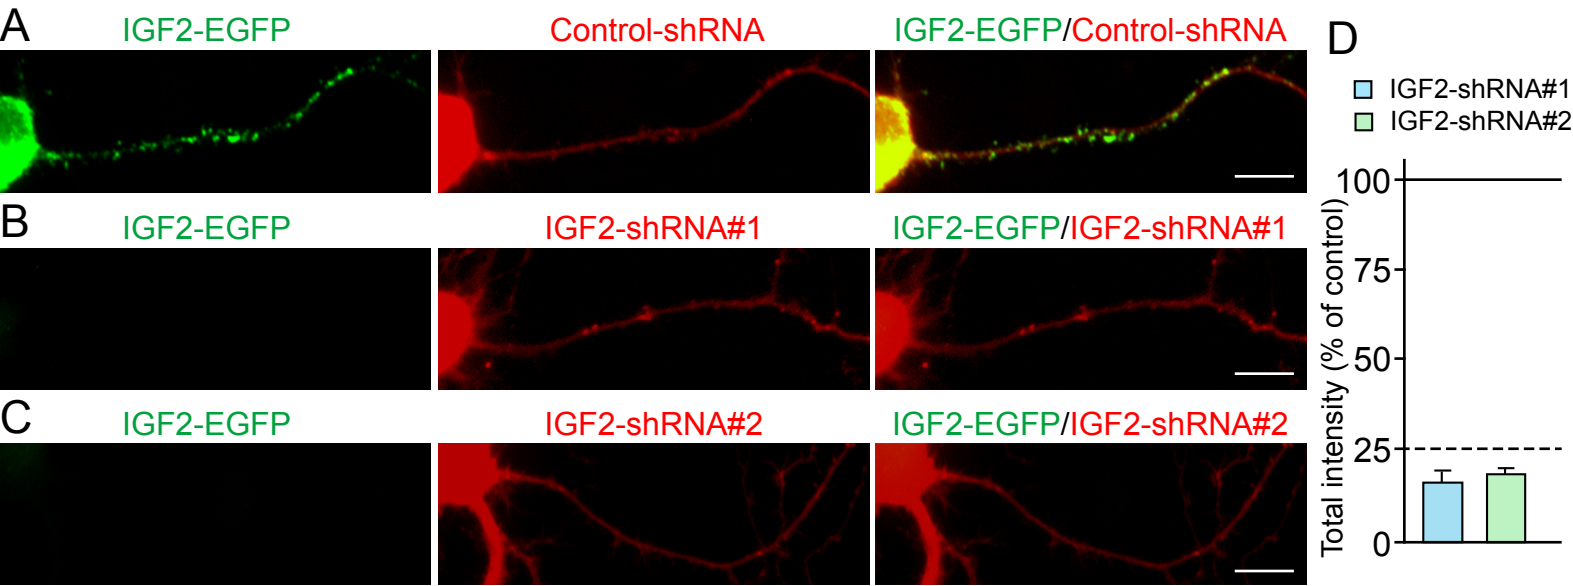

Supplement: supp [file elife-12151-supp-v1.zip]

Figure 3—figure supplement 1

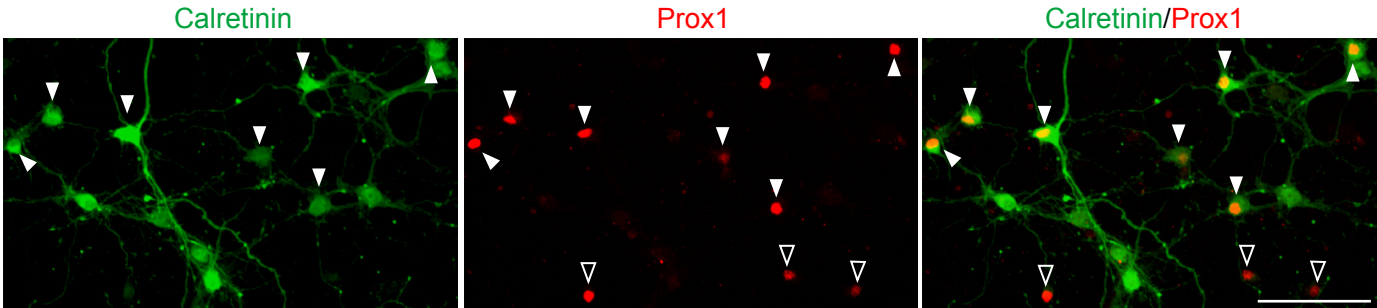

Supplement: supp [file elife-12151-supp-v1.zip]

Figure 9—figure supplement 1

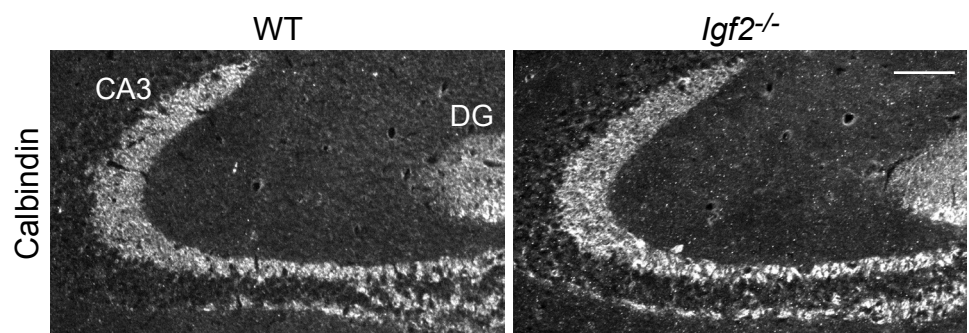

Supplement: supp [file elife-12151-supp-v1.zip]

Figure 5—figure supplement 1

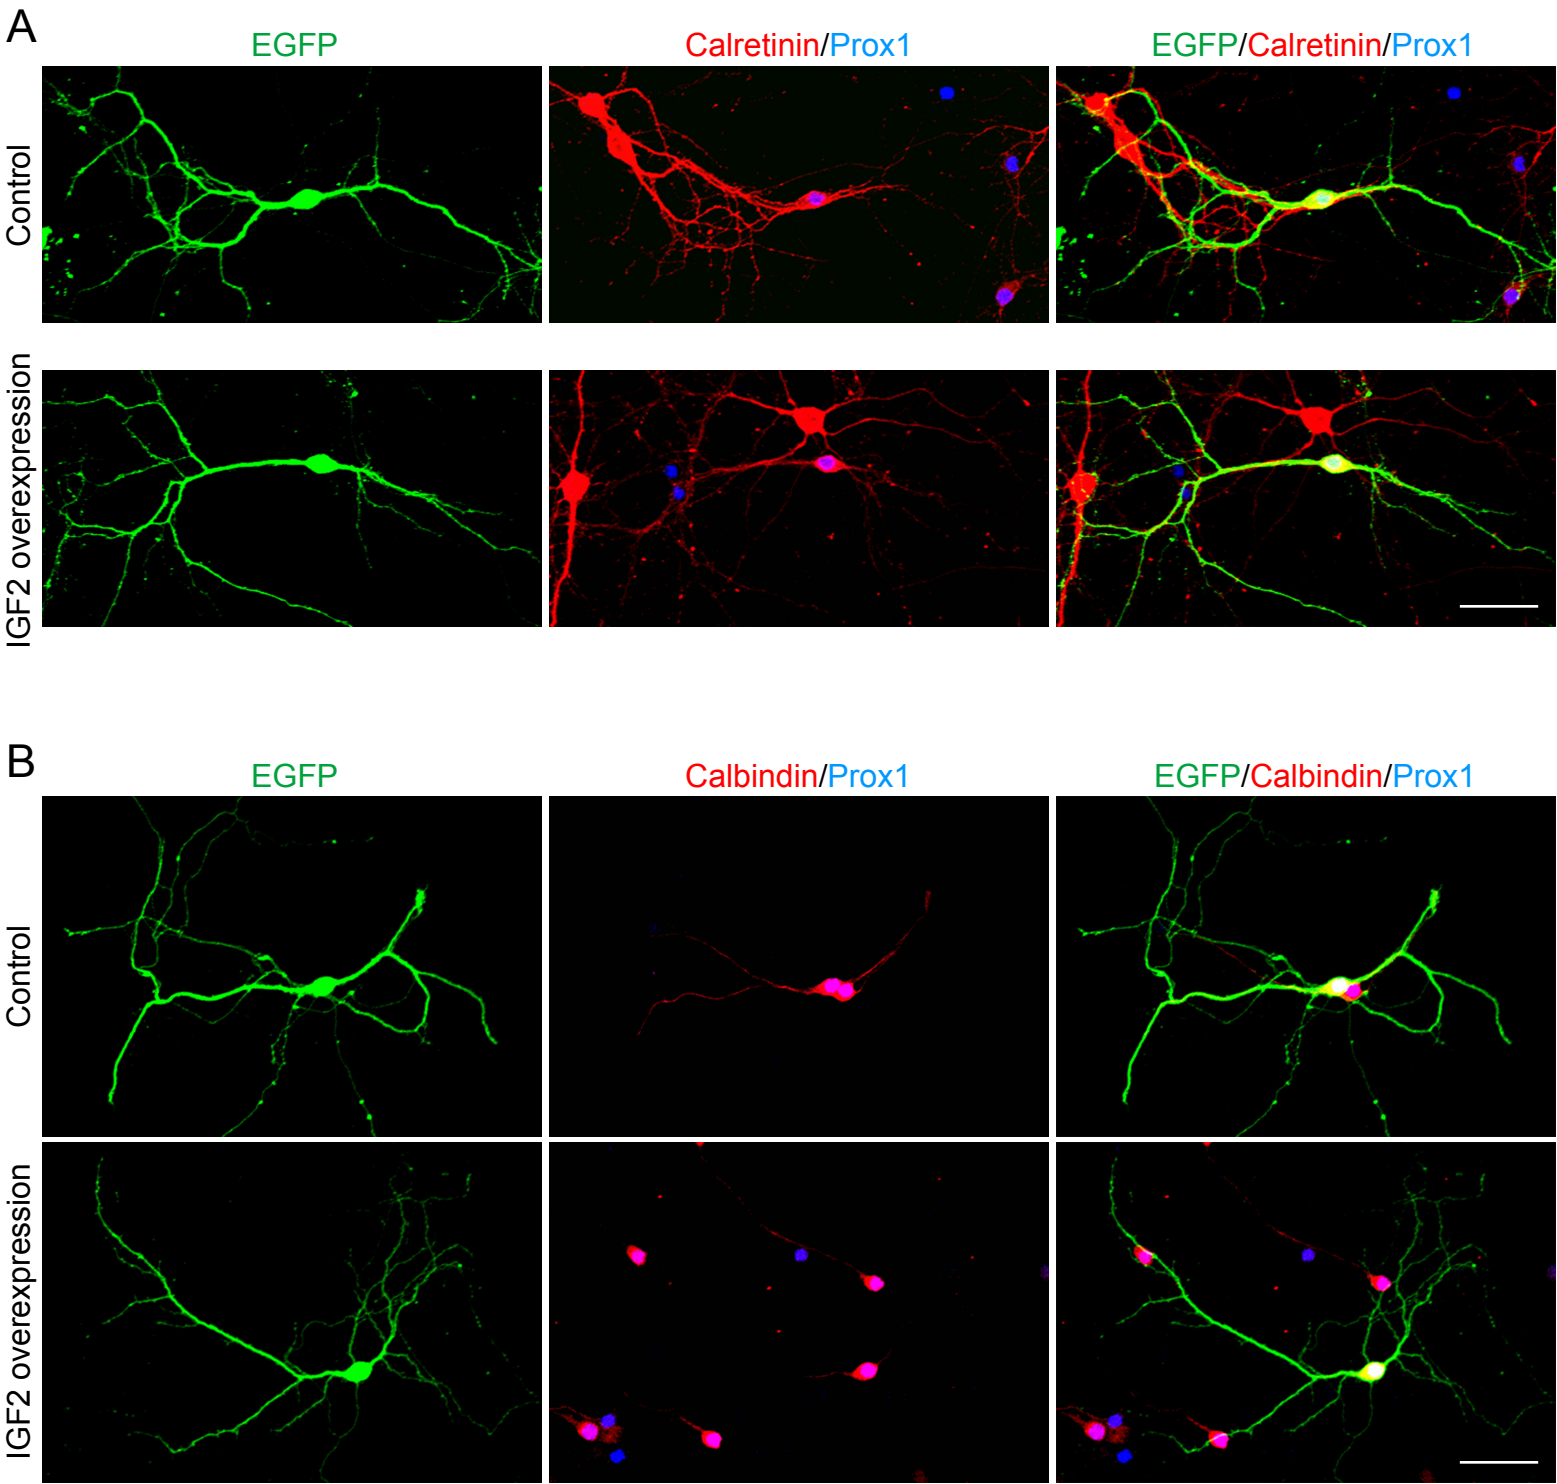

Supplement: supp [file elife-12151-supp-v1.zip]

Figure 4—figure supplement 1

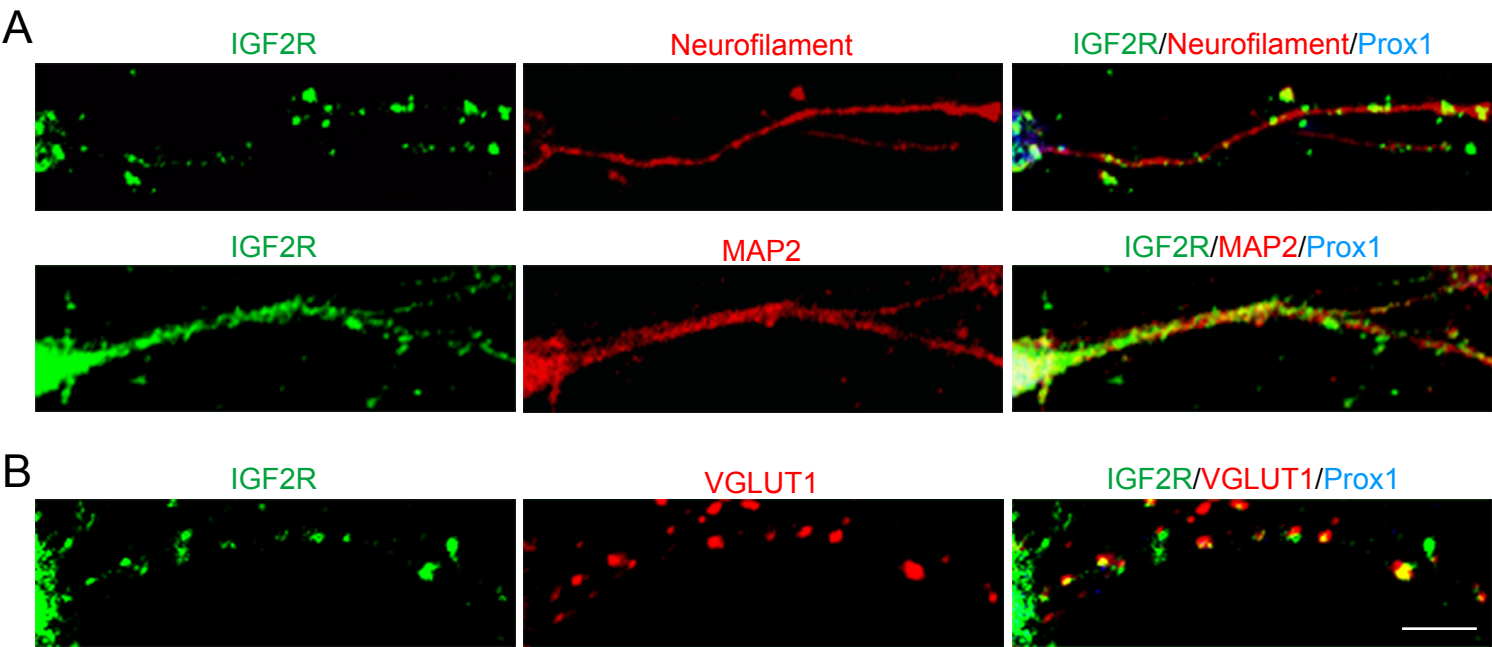

Supplement: supp [file elife-12151-supp-v1.zip]

Figure 1—figure supplement 1

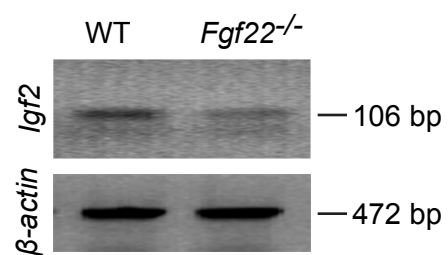

Supplement: supp [file elife-12151-supp-v1.zip]

Figure 1—figure supplement 2

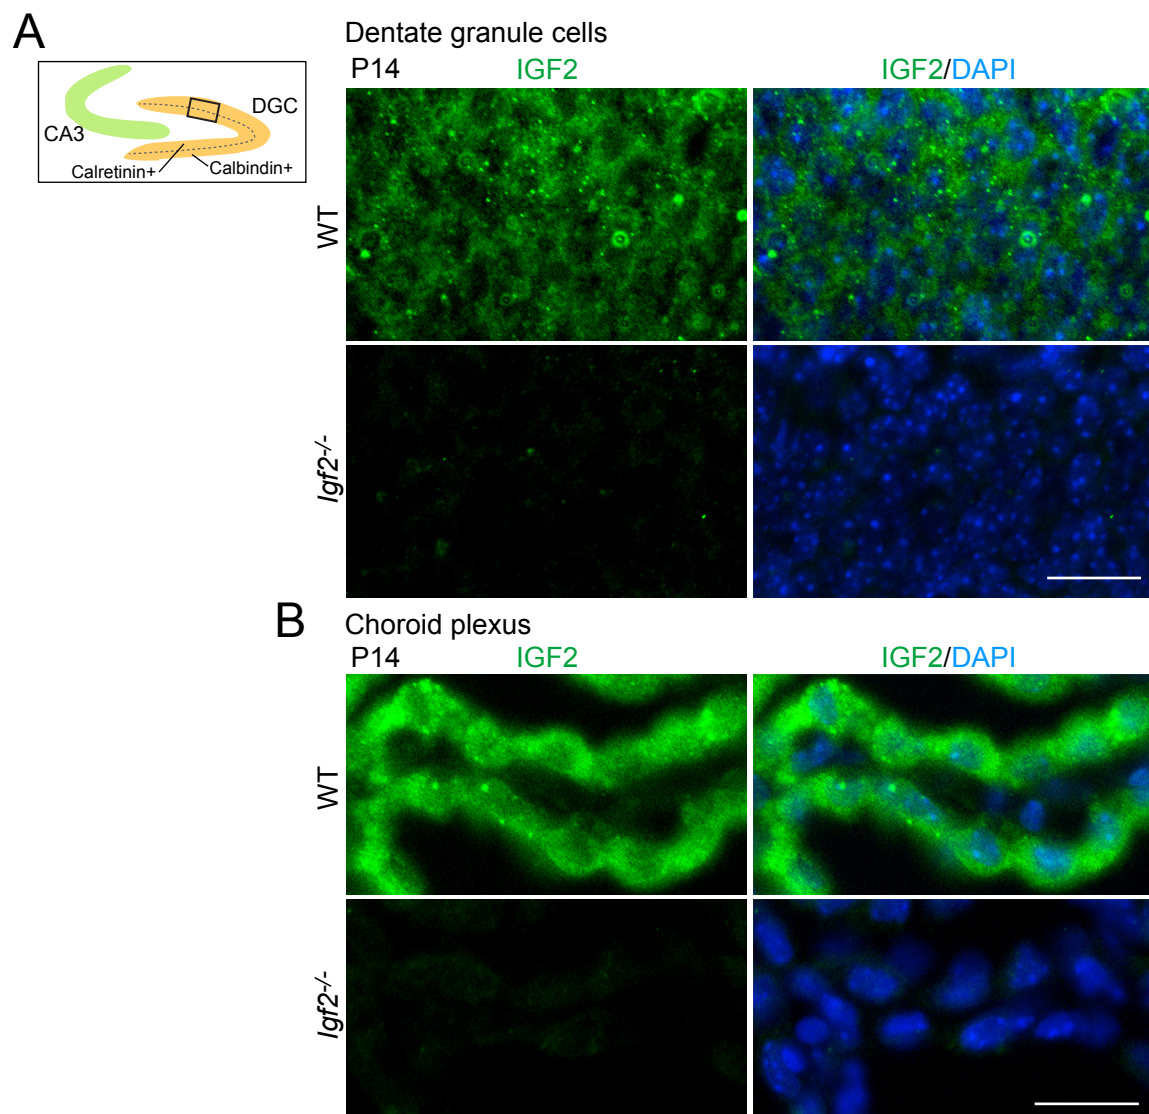

Supplement: supp [file elife-12151-supp-v1.zip]

Figure 8—figure supplement 2

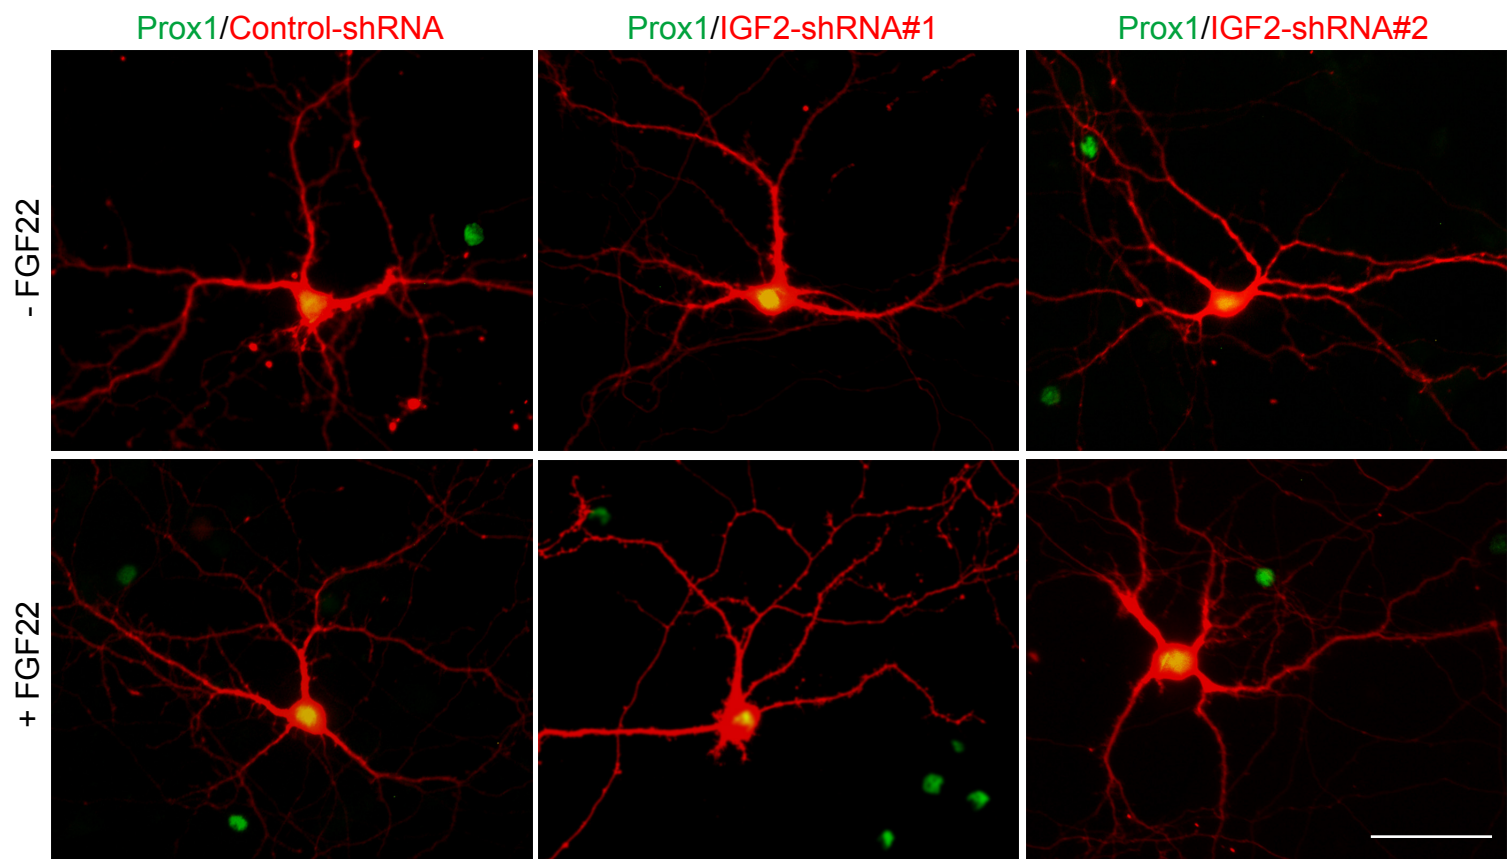

Supplement: supp [file elife-12151-supp-v1.zip]
